# Supplementary material
Source: HighWire-hosted journal article supplement (https://erj.ersjournals.com/content/51/2/1702146)
Supplement: inline-supplementary-material-1 [file inline-supplementary-material-1.pdf]

## Emphysema and extra-pulmonary tissue loss in COPD: A *Multi Organ Loss of Tissue* phenotype

Supplementary material.

The table S1 below shows findings in females and males for the variables reported in table 1 in the manuscript for the whole population. The results are similar independent of gender. Subjects in the most severe emphysema group LAA>25% represent the MOLT phenotype in both genders.

| Females                                       | Q1                | Q2                | Q3                | Q4                |                  |
|-----------------------------------------------|-------------------|-------------------|-------------------|-------------------|------------------|
|                                               | LAA<7.5%          | LAA 7.5–15%       | LAA 15–25%        | LAA≥25%           |                  |
|                                               | n=196             | n=147             | n=153             | n=158             | p-value          |
| <b>Demographics</b>                           |                   |                   |                   |                   |                  |
| <i>Age, years</i>                             | <b>61 (7)</b>     | <b>63 (7)</b>     | <b>64 (7)</b>     | <b>63 (6)</b>     | <b>0.001</b>     |
| <i>BMI (kg/m<sup>2</sup>)</i>                 | <b>27 (7)</b>     | <b>27 (7)</b>     | <b>26 (6)</b>     | <b>24 (4)</b>     | <b>&lt;0.001</b> |
| BMI (<21 kg/m <sup>2</sup> ) (%)              | 22%               | 15%               | 19%               | 27%               | 0.057            |
| <i>Fat-free Mass (kg)</i>                     | <b>43 (8)</b>     | <b>41 (8)</b>     | <b>40 (8)</b>     | <b>37 (7)</b>     | <b>&lt;0.001</b> |
| <i>Fat-free Mass Index (kg/m<sup>2</sup>)</i> | <b>16.1 (2.6)</b> | <b>15.7 (2.6)</b> | <b>15.2 (2.6)</b> | <b>14.2 (2.4)</b> | <b>&lt;0.001</b> |
| <b>Smoking exposure</b>                       |                   |                   |                   |                   |                  |
| Pack years                                    | 39 (22)           | 43 (20)           | 41 (22)           | 43 (21)           | 0.295            |
| <i>Current smoker (%)</i>                     | <b>57%</b>        | <b>37%</b>        | <b>31%</b>        | <b>20%</b>        | <b>&lt;0.001</b> |
| <b>Symptoms</b>                               |                   |                   |                   |                   |                  |
| <i>mMRC dyspnea score</i>                     | <b>1.4 (1.1)</b>  | <b>1.7 (1.0)</b>  | <b>1.9 (1.0)</b>  | <b>1.9 (1.0)</b>  | <b>&lt;0.001</b> |
| <i>SGRQ total score</i>                       | <b>43 (21)</b>    | <b>48 (17)</b>    | <b>50 (16)</b>    | <b>52 (15)</b>    | <b>&lt;0.001</b> |
| Previous exacerbations (patient/yr)           | 0.91              | 0.93              | 1.17              | 1.16              | 0.120            |
| COPD Hospitalizations (patient/yr)            | 0.14              | 0.18              | 0.29              | 0.22              | 0.151            |
| <b>Self-reported comorbidities</b>            |                   |                   |                   |                   |                  |
| Cardiovascular disease                        | 28%               | 27%               | 23%               | 22%               | 0.522            |
| Chronic bronchitis                            | 30%               | 30%               | 25%               | 21%               | 0.201            |
| <i>Osteoporosis</i>                           | <b>19%</b>        | <b>17%</b>        | <b>27%</b>        | <b>41%</b>        | <b>&lt;0.001</b> |
| <i>Diabetes</i>                               | <b>11%</b>        | <b>8%</b>         | <b>4%</b>         | <b>1%</b>         | <b>0.001</b>     |
| Reflux/heartburn                              | 29%               | 31%               | 33%               | 27%               | 0.654            |
| <b>Medications</b>                            |                   |                   |                   |                   |                  |
| <i>Inhaled corticosteroids</i>                | <b>64%</b>        | <b>74%</b>        | <b>77%</b>        | <b>87%</b>        | <b>&lt;0.001</b> |
| Oral corticosteroids                          | <1%               | 1%                | 2%                | <1%               | 0.546            |

|                                          |                       |                       |                       |                       |                  |
|------------------------------------------|-----------------------|-----------------------|-----------------------|-----------------------|------------------|
| Statins                                  | 19%                   | 22%                   | 11%                   | 20%                   | 0.070            |
| <b>Physiology</b>                        |                       |                       |                       |                       |                  |
| <b>Heart rate (bpm)</b>                  | <b>77 (12)</b>        | <b>80 (13)</b>        | <b>81 (12)</b>        | <b>78 (11)</b>        | <b>0.011</b>     |
| Systolic BP (mmHg)                       | 130 (18)              | 134 (20)              | 134 (19)              | 130 (17)              | 0.072            |
| <b>Diastolic BP (mmHg)</b>               | <b>77 (10)</b>        | <b>78 (12)</b>        | <b>80 (13)</b>        | <b>76 (10)</b>        | <b>0.032</b>     |
| <b>FEV<sub>1</sub> (L)</b>               | <b>1.39 (0.38)</b>    | <b>1.18 (0.34)</b>    | <b>0.99 (0.32)</b>    | <b>0.89 (0.30)</b>    | <b>&lt;0.001</b> |
| <b>FEV<sub>1</sub> Percent predicted</b> | <b>61 (13)</b>        | <b>53 (13)</b>        | <b>46 (14)</b>        | <b>41 (13)</b>        | <b>&lt;0.001</b> |
| FVC (L)                                  | 2.49 (0.61)           | 2.50 (0.64)           | 2.38 (0.68)           | 2.36 (0.67)           | 0.121            |
| <b>FEV<sub>1</sub>/FVC (%)</b>           | <b>56 (8)</b>         | <b>47 (9)</b>         | <b>42 (9)</b>         | <b>38 (8)</b>         | <b>&lt;0.001</b> |
| <b>Oxygen saturation (%)</b>             | <b>95.3 (2.7)</b>     | <b>94.3 (3.4)</b>     | <b>94.3 (2.8)</b>     | <b>94.6 (2.8)</b>     | <b>0.003</b>     |
| <b>6MWD (m)</b>                          | <b>385 (113)</b>      | <b>369 (103)</b>      | <b>344 (125)</b>      | <b>317 (128)</b>      | <b>&lt;0.001</b> |
| <b>BODE index</b>                        | <b>2.1 (1.8)</b>      | <b>2.7 (1.9)</b>      | <b>3.7 (2.2)</b>      | <b>4.3 (2.1)</b>      | <b>&lt;0.001</b> |
| <b>Circulating blood</b>                 |                       |                       |                       |                       |                  |
| Hematocrit (%)                           | 0.42 (0.04)           | 0.42 (0.03)           | 0.42 (0.04)           | 0.42 (0.03)           | 0.543            |
| Hemoglobin (g/L)                         | 139 (11)              | 140 (11)              | 140 (12)              | 141 (11)              | 0.603            |
| WBC (10 <sup>9</sup> /L)                 | 8.2 (2.6)             | 7.7 (2.3)             | 7.6 (2.6)             | 7.7 (2.3)             | 0.162            |
| Neutrophils (10 <sup>9</sup> /L)         | 5.2 (2.2)             | 4.9 (2.1)             | 5.1 (2.4)             | 5.1 (2.1)             | 0.694            |
| Eosinophils (10 <sup>9</sup> /L)         | 0.21 (0.20)           | 0.21 (0.14)           | 0.19 (0.14)           | 0.20 (0.14)           | 0.387            |
| Fibrinogen (mg/dL)                       | 437 [383–499]         | 444 [392–517]         | 474 [402–530]         | 449 [383–499]         | 0.164            |
| CRP (mg/L)                               | 2.7 [1.3–7.8]         | 3.0 [1.3–8.2]         | 3.3 [1.6–7.1]         | 2.4 [1.1–4.8]         | 0.088            |
| IL-6 (pg/mL)                             | 1.9 [0.5–4.1]         | 1.9 [0.2–4.6]         | 2.1 [0.6–4.0]         | 1.7 [0.7–3.4]         | 0.933            |
| <b>IL-8 (pg/mL)</b>                      | <b>8.1 [4.2–15.1]</b> | <b>7.4 [3.1–13.8]</b> | <b>6.2 [3.2–10.4]</b> | <b>6.0 [3.1–11.8]</b> | <b>0.010</b>     |
| <b>CC-16 (ng/mL)</b>                     | <b>4.1 [2.7–5.9]</b>  | <b>4.0 [2.7–5.8]</b>  | <b>4.3 [3.2–6.1]</b>  | <b>4.8 [3.3–6.7]</b>  | <b>0.013</b>     |
| <b>SP-D (ng/mL)</b>                      | <b>122 [84–199]</b>   | <b>117 [82–177]</b>   | <b>112 [84–158]</b>   | <b>110 [72–151]</b>   | <b>0.009</b>     |
| <b>sRAGE (ng/mL)</b>                     | <b>1.5 [1.1–1.9]</b>  | <b>1.4 [1.0–1.8]</b>  | <b>1.2 [0.9–1.5]</b>  | <b>1.1 [0.8–1.4]</b>  | <b>&lt;0.001</b> |
| <b>CCL-18 (ng/mL)</b>                    | <b>95 [77–120]</b>    | <b>100 [77–123]</b>   | <b>111 [84–142]</b>   | <b>99 [75–133]</b>    | <b>0.037</b>     |

| Males                                         | Q1                 | Q2                 | Q3                 | Q4                 |                  |
|-----------------------------------------------|--------------------|--------------------|--------------------|--------------------|------------------|
|                                               | LAA<7.5%           | LAA 7.5–15%        | LAA 15–25%         | LAA≥25%            |                  |
|                                               | n=240              | n=296              | n=305              | n=322              | p-value          |
| <b>Demographics</b>                           |                    |                    |                    |                    |                  |
| <i>Age, years</i>                             | <b>62 (8)</b>      | <b>64 (7)</b>      | <b>65 (6)</b>      | <b>64 (7)</b>      | <b>&lt;0.001</b> |
| <i>BMI (kg/m<sup>2</sup>)</i>                 | <b>28 (5)</b>      | <b>28 (6)</b>      | <b>27 (5)</b>      | <b>25 (5)</b>      | <b>&lt;0.001</b> |
| <i>BMI (&lt;21 kg/m<sup>2</sup>) (%)</i>      | <b>5%</b>          | <b>9%</b>          | <b>12%</b>         | <b>23%</b>         | <b>&lt;0.001</b> |
| <i>Fat-free Mass (kg)</i>                     | <b>61 (10)</b>     | <b>59 (10)</b>     | <b>57 (10)</b>     | <b>53 (11)</b>     | <b>&lt;0.001</b> |
| <i>Fat-free Mass Index (kg/m<sup>2</sup>)</i> | <b>20.0 (2.8)</b>  | <b>19.8 (3.1)</b>  | <b>19.0 (3.1)</b>  | <b>17.5 (3.0)</b>  | <b>&lt;0.001</b> |
| <b>Smoking exposure</b>                       |                    |                    |                    |                    |                  |
| Pack years                                    | 50(28)             | 51 (31)            | 55 (28)            | 51 (27)            | 0.213            |
| <i>Current smoker (%)</i>                     | <b>54%</b>         | <b>41%</b>         | <b>30%</b>         | <b>22%</b>         | <b>&lt;0.001</b> |
| <b>Symptoms</b>                               |                    |                    |                    |                    |                  |
| <i>mMRC dyspnea score</i>                     | <b>1.4 (1.0)</b>   | <b>1.6 (1.1)</b>   | <b>1.7 (1.0)</b>   | <b>1.9 (1.0)</b>   | <b>&lt;0.001</b> |
| <i>SGRQ total score</i>                       | <b>43 (20)</b>     | <b>46 (19)</b>     | <b>48 (18)</b>     | <b>54 (16)</b>     | <b>&lt;0.001</b> |
| <i>Previous exacerbations (patient/yr)</i>    | <b>0.51</b>        | <b>0.75</b>        | <b>0.84</b>        | <b>1.05</b>        | <b>&lt;0.001</b> |
| <i>COPD Hospitalizations (patient/yr)</i>     | <b>0.14</b>        | <b>0.22</b>        | <b>0.17</b>        | <b>0.29</b>        | <b>0.013</b>     |
| <b>Self-reported comorbidities</b>            |                    |                    |                    |                    |                  |
| <i>Cardiovascular disease</i>                 | <b>35%</b>         | <b>40%</b>         | <b>39%</b>         | <b>29%</b>         | <b>0.018</b>     |
| <i>Chronic bronchitis</i>                     | <b>38%</b>         | <b>31%</b>         | <b>34%</b>         | <b>41%</b>         | <b>0.037</b>     |
| <i>Osteoporosis</i>                           | <b>1%</b>          | <b>4%</b>          | <b>7%</b>          | <b>7%</b>          | <b>0.002</b>     |
| <i>Diabetes</i>                               | <b>13%</b>         | <b>14%</b>         | <b>13%</b>         | <b>7%</b>          | <b>0.024</b>     |
| Reflux/heartburn                              | 25%                | 24%                | 23%                | 20%                | 0.416            |
| <b>Medications</b>                            |                    |                    |                    |                    |                  |
| <i>Inhaled corticosteroids</i>                | <b>50%</b>         | <b>67%</b>         | <b>74%</b>         | <b>85%</b>         | <b>&lt;0.001</b> |
| Oral corticosteroids                          | <1%                | 1%                 | <1%                | 2%                 | 0.848            |
| <i>Statins</i>                                | <b>26%</b>         | <b>28%</b>         | <b>28%</b>         | <b>19%</b>         | <b>0.029</b>     |
| <b>Physiology</b>                             |                    |                    |                    |                    |                  |
| <i>Heart rate (bpm)</i>                       | <b>75 (14)</b>     | <b>76 (13)</b>     | <b>78 (14)</b>     | <b>82 (13)</b>     | <b>&lt;0.001</b> |
| Systolic BP (mmHg)                            | 135 (20)           | 134 (19)           | 134 (17)           | 132 (18)           | 0.352            |
| Diastolic BP (mmHg)                           | 80 (11)            | 79 (10)            | 80 (10)            | 80 (11)            | 0.928            |
| <i>FEV<sub>1</sub> (L)</i>                    | <b>1.83 (0.51)</b> | <b>1.58 (0.48)</b> | <b>1.41 (0.50)</b> | <b>1.15 (0.42)</b> | <b>&lt;0.001</b> |
| <i>FEV<sub>1</sub> Percent predicted</i>      | <b>57 (14)</b>     | <b>51 (14)</b>     | <b>46 (15)</b>     | <b>37 (13)</b>     | <b>&lt;0.001</b> |
| FVC (L)                                       | 3.42 (0.87)        | 3.37 (0.78)        | 3.41 (0.87)        | 3.34 (0.90)        | 0.646            |
| <i>FEV<sub>1</sub>/FVC (%)</i>                | <b>54 (9)</b>      | <b>47 (10)</b>     | <b>41 (9)</b>      | <b>34 (8)</b>      | <b>&lt;0.001</b> |
| <i>Oxygen saturation (%)</i>                  | <b>95.1 (2.5)</b>  | <b>94.6 (3.3)</b>  | <b>94.4 (3.3)</b>  | <b>94.1 (2.9)</b>  | <b>0.002</b>     |

|                                  |                      |                      |                      |                      |                  |
|----------------------------------|----------------------|----------------------|----------------------|----------------------|------------------|
| <b>6MWD (m)</b>                  | <b>411 (113)</b>     | <b>392 (124)</b>     | <b>375 (115)</b>     | <b>343 (117)</b>     | <b>&lt;0.001</b> |
| <b>BODE index</b>                | <b>2.1 (1.7)</b>     | <b>2.8 (1.8)</b>     | <b>3.3 (2.0)</b>     | <b>4.3 (2.1)</b>     | <b>&lt;0.001</b> |
| <b>Circulating blood</b>         |                      |                      |                      |                      |                  |
| Hematocrit (%)                   | 0.45 (0.04)          | 0.45 (0.04)          | 0.44 (0.04)          | 0.45 (0.04)          | 0.508            |
| Hemoglobin (g/L)                 | 149 (13)             | 149 (14)             | 148 (12)             | 150 (12)             | 0.484            |
| WBC (10 <sup>9</sup> /L)         | 8.1 (2.5)            | 7.8 (2.2)            | 8.0 (2.4)            | 7.9 (2.1)            | 0.446            |
| Neutrophils (10 <sup>9</sup> /L) | 5.3 (2.1)            | 5.1 (1.8)            | 5.4 (2.2)            | 5.3 (1.7)            | 0.509            |
| Eosinophils (10 <sup>9</sup> /L) | 0.24 (0.20)          | 0.23 (0.16)          | 0.23 (0.16)          | 0.21 (0.16)          | 0.143            |
| Fibrinogen (mg/dL)               | 430 [376–499]        | 438 [379–498]        | 449 [391–504]        | 454 [390–512]        | 0.074            |
| CRP (mg/L)                       | 3.3 [1.7–7.6]        | 3.7 [1.6–7.1]        | 3.6 [1.7–7.6]        | 3.2 [1.4–7.2]        | 0.852            |
| IL-6 (pg/mL)                     | 2.0 [0.4–4.8]        | 2.3 [0.6–5.1]        | 2.3 [0.6–5.2]        | 1.9 [0.2–4.6]        | 0.509            |
| IL-8 (pg/mL)                     | 7.7 [3.6–16.0]       | 7.3 [3.7–13.7]       | 7.2 [3.6–11.9]       | 6.9 [3.2–11.9]       | 0.208            |
| CC-16 (ng/mL)                    | 5.1 [3.5–7.2]        | 5.2 [3.7–7.5]        | 5.4 [3.9–7.2]        | 5.6 [4.0–7.2]        | 0.481            |
| <b>SP-D (ng/mL)</b>              | <b>137 [94–188]</b>  | <b>122 [86–173]</b>  | <b>123 [89–175]</b>  | <b>116 [83–168]</b>  | <b>0.044</b>     |
| <b>sRAGE (ng/mL)</b>             | <b>1.4 [1.0–1.9]</b> | <b>1.3 [1.0–1.7]</b> | <b>1.2 [0.9–1.7]</b> | <b>1.0 [0.8–1.3]</b> | <b>&lt;0.001</b> |
| CCL-18 (ng/mL)                   | 104 [84–132]         | 108 [83–141]         | 112 [90–140]         | 99 [75–133]          | 0.431            |
